# Supplementary material for: Co-inhibitory T cell receptor KLRG1: human cancer expression and efficacy of neutralization in murine cancer models
Source: PubMed Central journal article supplement (PMC6402715; doi:10.18632/oncotarget.26659), 2019-02-15
Supplement: oncotarget-10-1399-s001.pdf [file oncotarget-10-1399-s001.pdf]

## Co-inhibitory T cell receptor KLRG1: human cancer expression and efficacy of neutralization in murine cancer models

### SUPPLEMENTARY MATERIALS

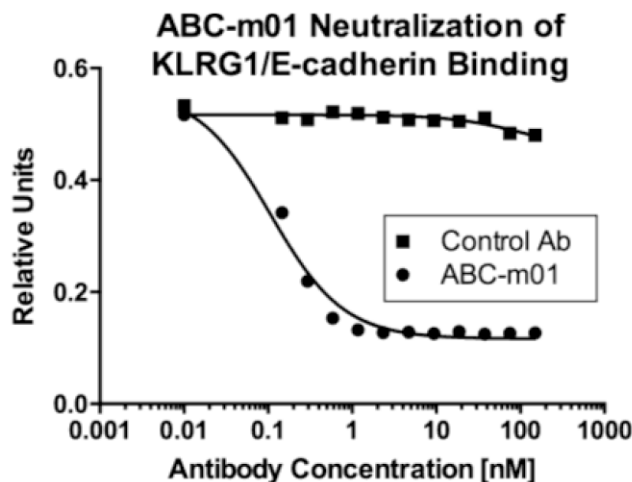

Supplementary Figure 1: Anti-KLRG1 antibody used in efficacy models neutralizes interaction of KLRG1 with E-cadherin in competition experiments.

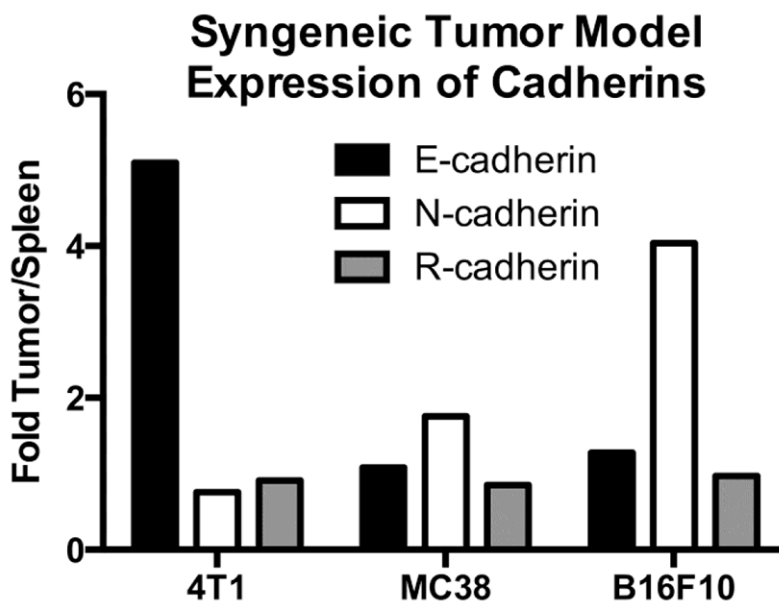

Supplementary Figure 2: Gene expression levels of KLRG1 ligands on 4T1, MC38, and B16F10 tumor samples. Data from Gene Expression Omnibus dataset GSE88509.

**Supplementary Table 1: Healthy human blood % of indicated lymphocyte subsets that are CTLA-4+, PD-1+, or KLRG1+ by flow cytometry in published literature.**

See Supplementary File 1

**Supplementary Table 2: Single-cell RNAseq genomic datasets analyzed in Figure 2**

| Dataset   | Cancer        | Used for T Cell Analysis? | Used for Ligand Analysis?        |
|-----------|---------------|---------------------------|----------------------------------|
| GSE72046  | Melanoma      | Yes                       | Yes                              |
| GSE98638  | HCC           | Yes                       | No (T cells only)                |
| GSE103322 | HNSCC         | Yes                       | Yes                              |
| GSE89567  | Astrocytoma   | Yes                       | No, cannot determine tumor cells |
| GSE75688  | Breast cancer | No                        | Yes                              |
| GSE67980  | Prostate CTC  | No                        | Yes                              |
| GSE81861  | CRC           | No                        | Yes                              |
| GSE86978  | Breast CTC    | No                        | Yes                              |

**Supplementary Table 3: Genomic datasets analyzed in Figure 3**

| Dataset          | Cancer     | Treatment             | Tissue Sample | Number of Patients | Duration of Treatment (Weeks) | KLRG1 Fold Ratio |
|------------------|------------|-----------------------|---------------|--------------------|-------------------------------|------------------|
| GSE59733         | Breast     | Radiation             | Tumor         | 9                  | 1                             | 1.21             |
| GSE15781         | Colorectal | Radiation             | Tumor         | 9                  | 10                            | 2.30             |
| GSE101920        | Breast     | Radiation             | Tumor         | 5                  | ?                             | 1.33             |
| GSE10281         | Breast     | Endocrine             | Tumor         | 18                 | 2                             | 1.18             |
| E-MTAB-887       | Breast     | Endocrine             | Tumor         | 38                 | 6                             | 1.12             |
| GSE55374         | Breast     | Endocrine             | Tumor         | 13                 | 12                            | 1.29             |
| GSE80077         | Breast     | Endocrine             | Tumor         | 30                 | 2 weeks                       | 1.16             |
| GSE87411         | Breast     | Endocrine             | Tumor         | 109                | 2-4 weeks                     | 1.07             |
| GSE48403         | Prostate   | Endocrine             | Tumor         | 7                  | 22                            | 1.03             |
| GSE55410         | Ovarian    | Chemotherapy          | Tumor         | 13                 | 1                             | 1.10             |
| GSE51005         | Prostate   | Chemotherapy          | Tumor         | 6                  | 6                             | 2.00             |
| E-MTAB-4439-WK12 | Breast     | Chemotherapy          | Tumor         | 97                 | 12                            | 1.14             |
| E-MTAB-4439-WK25 | Breast     | Chemotherapy          | Tumor         | 111                | 25                            | 1.14             |
| GSE28826         | Breast     | Chemotherapy          | Tumor         | 14                 | 12                            | 0.94             |
| GSE28844         | Breast     | Chemotherapy          | Tumor         | 28                 | 6-24                          | 1.09             |
| GSE54323         | Breast     | Chemotherapy          | Tumor         | 14                 | 2                             | 1.21             |
| GSE77714 ipi     | Melanoma   | Ipilimumab            | Blood T cells | 5                  | 3                             | 1.13             |
| GSE77714 nivo    | Melanoma   | Nivolumab             | Blood T cells | 7                  | 3                             | 1.15             |
| GSE52562         | Lymphoma   | Pidilizumab+rituximab | Tumor         | 8                  | 16                            | 1.06             |
| E-MTAB-3218      | Renal cell | Nivolumab             | Tumor         | 42                 | 4                             | 1.49             |
| GSE77910         | Prostate   | Ipilimumab            | Tumor         | 6                  | Not specified                 | 1.56             |
